# Supplementary material for: Heterogeneous nuclear ribonucleoprotein A1 regulates rhythmic synthesis of mouse Nfil3 protein via IRES-mediated translation
Source: PubMed Central journal article supplement (PMC5318856; doi:10.1038/srep42882), 2017-02-21
Supplement: srep42882-s1.pdf [file srep42882-s1.pdf]

**Supplementary information for**

## **Heterogeneous nuclear ribonucleoprotein A1 regulates rhythmic synthesis of mouse Nfil3 protein via IRES-mediated translation**

Hyo-Jin Kim<sup>1</sup>, Hwa-Rim Lee<sup>2</sup>, Ji-Young Seo<sup>3</sup>, Hye Guk Ryu<sup>1</sup>, Kyung-Ha Lee<sup>4</sup>, Do-Yeon Kim<sup>5</sup> and Kyong-Tai Kim<sup>1, 3, \*</sup>

<sup>1</sup>Department of Life Sciences, Pohang University of Science and Technology (POSTECH), Pohang, Gyeongbuk, Korea; <sup>2</sup>School of Interdisciplinary Bioscience and Bioengineering, Pohang University of Science and Technology (POSTECH), Pohang, Gyeongbuk, Korea; <sup>3</sup>Division of Integrative Biosciences and Biotechnology, Pohang University of Science and Technology (POSTECH), Pohang, Gyeongbuk, Korea; <sup>4</sup>Division of Bio-Technology and Convergence, Daegu Haany University, Gyeongsan, Gyeongsangbuk-do, Korea; <sup>5</sup>Department of Pharmacology, School of Dentistry, Kyungpook National University, Daegu, Korea

\* To whom correspondence should be addressed.

Tel: 82-54-279-2297

Fax: 82-54-279-2199

Email: [ktk@postech.ac.kr](mailto:ktk@postech.ac.kr)

## Supplementary Figures

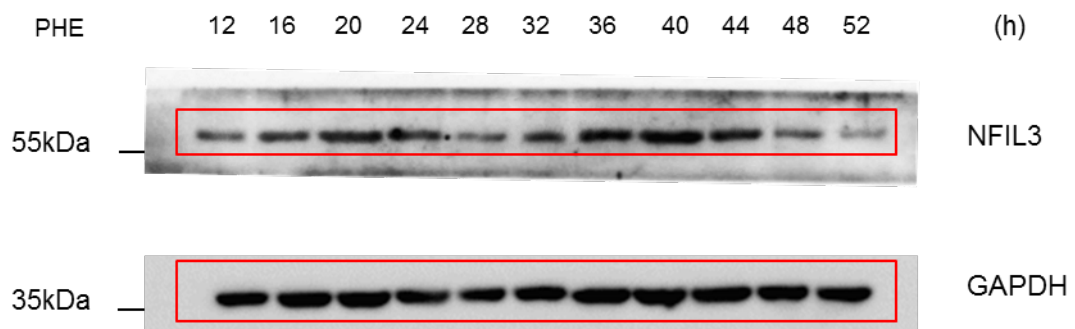

**Figure S1.** The full-length gel blots that included in Figure 1a.

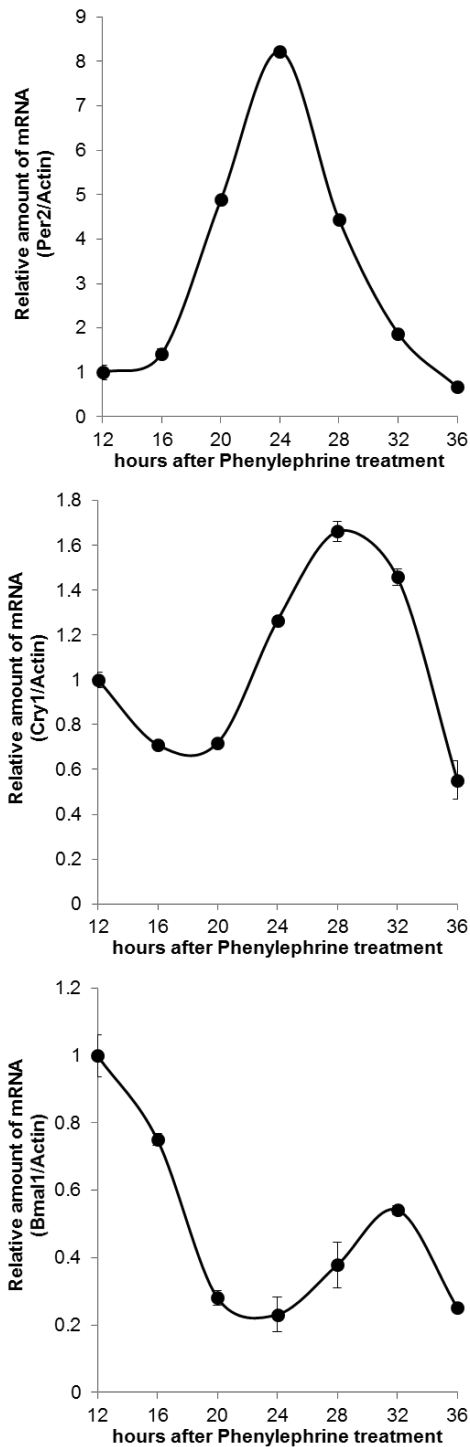

**Figure S2. Core clock gene oscillation after PHE treatment.** MC3T3-E1 cells were treated with 10  $\mu$ M phenylephrine (PHE). After 12 hours, cells were harvested at the indicated time points and subjected to quantitative real-time PCR analysis. Relative Bmal1, Cry1 and Per2 mRNA levels were normalized to Actin mRNA. RNA levels at the initial time point were arbitrarily set to 1.0.

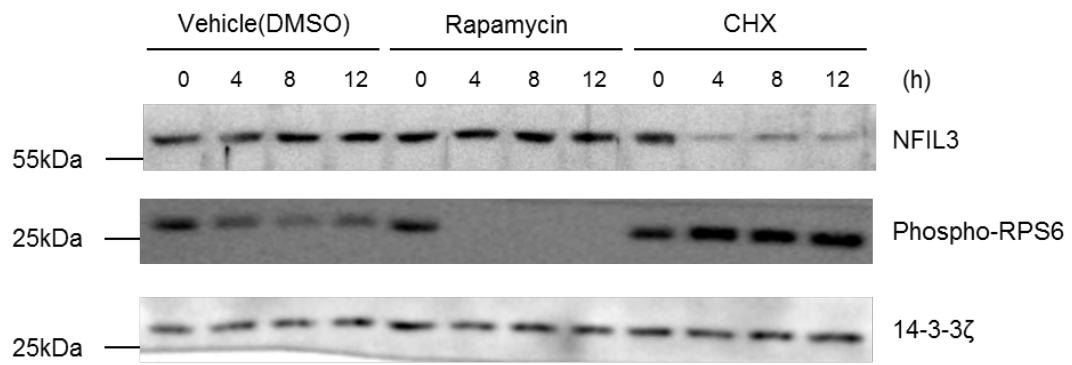

**Figure S3. Nfil3 protein synthesis is rapamycin-insensitive.** Rapamycin and cyclohexamide (CHX) treated MC3T3-E1 cells were harvested at the indicated time points. Protein levels were measured by immunoblotting.

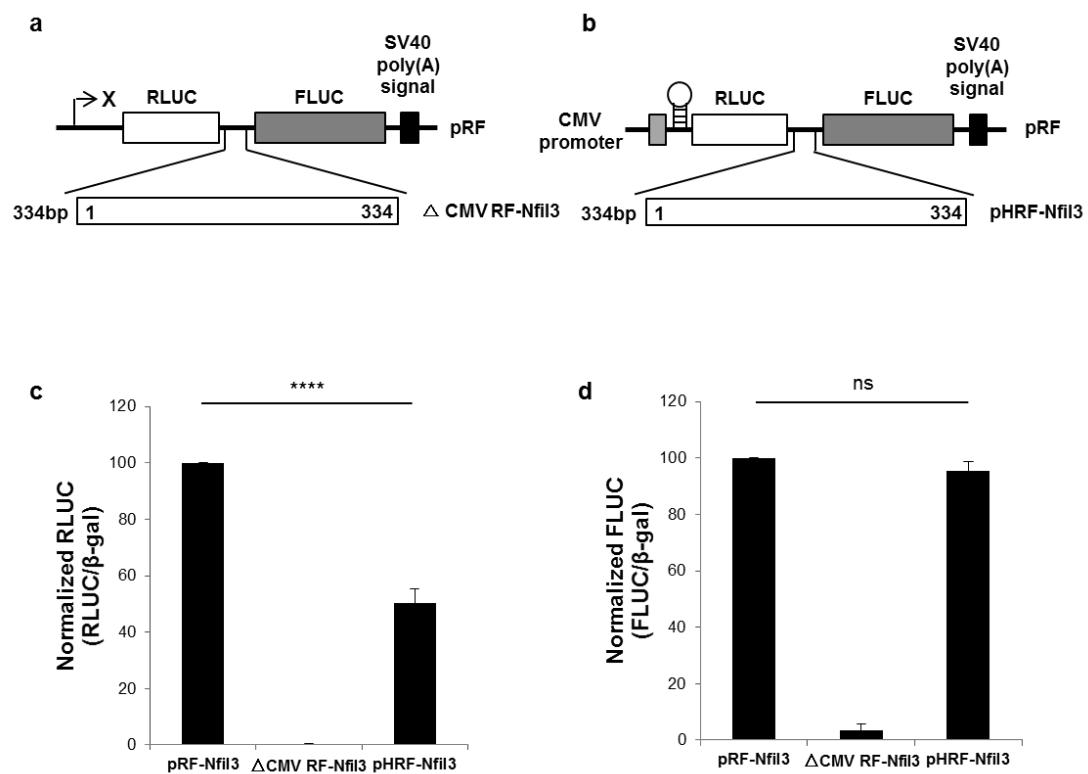

**Figure S4. Normalized luciferase activities of Nfil3 5'-UTR.** (a) Schematic diagram of the bicistronic reporter vector with no CMV promoter. (b) Schematic diagram of the bicistronic reporter vector harboring a hairpin structure. (c,d) Reporter vectors without the CMV promoter or hairpin structure were transfected into MC3T3-E1 cells. Activities of Nfil3 5'-UTR containing the reporter vectors were calculated based on the ratio of each luciferase, and normalized luciferase activities of pRF-Nfil3 were set to 100 ( $n = 3$ ), \*\*\*\*  $P < 0.0001$ . The plasmid containing  $\beta$ -galactosidase was co-transfected for the normalization.

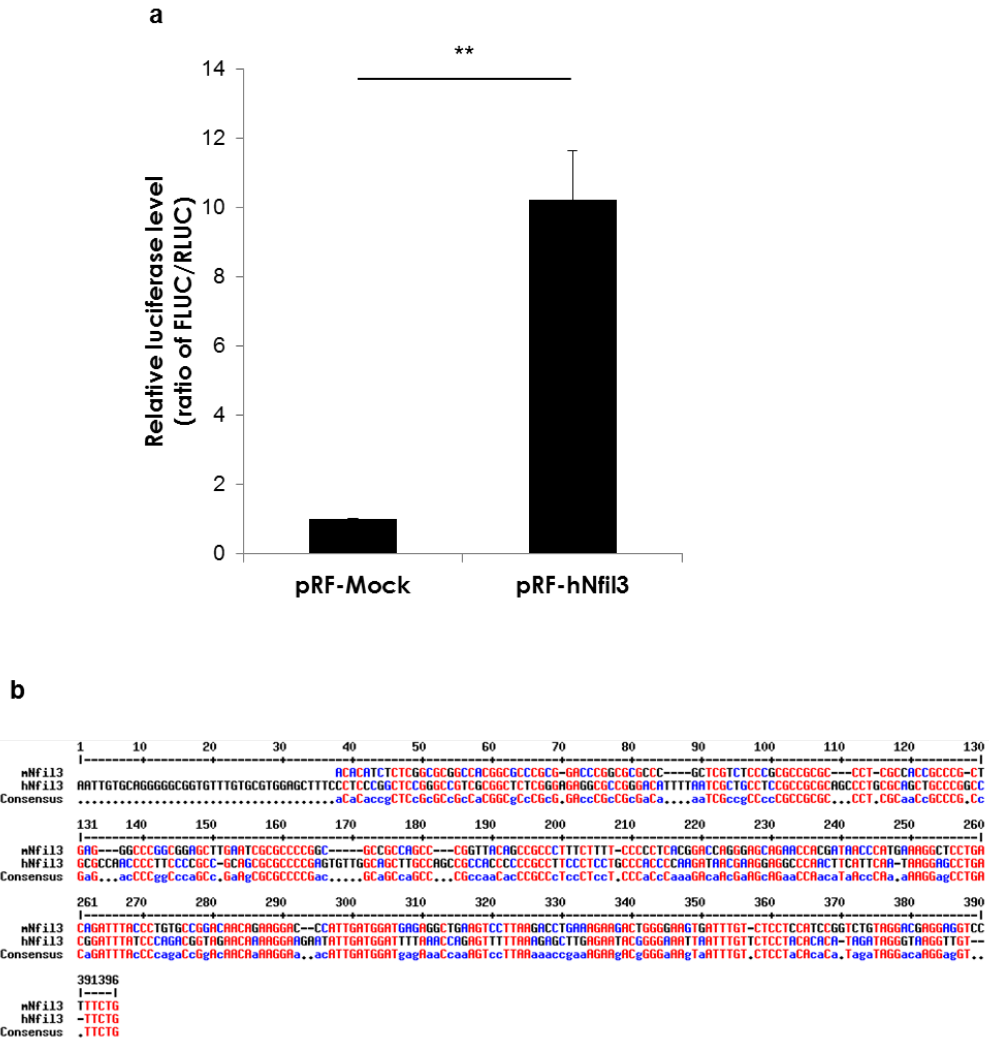

**Figure S5. Human Nfil3 5'-UTR also have IRES activity.** (a) 293A cells were transfected with a bicistronic reporter vector. Samples were harvested 24 hours after transfection of the reporter vector then subjected to a luciferase assay. The ratio of FLUC/RLUC of cells transfected with pRF empty vector was set to 1.0. Error bars represent mean  $\pm$  SEM ( $n = 3$ ), \*\*  $P < 0.01$ . (b) Sequence alignment of human (NCBI accession number: NM\_001290000) and mouse Nfil3 5'-UTRs.

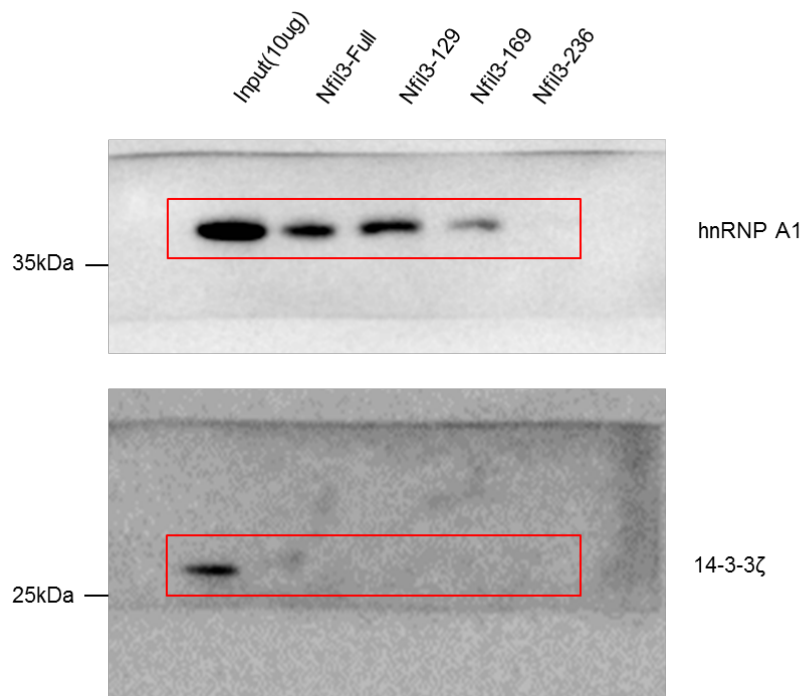

**Figure S6.** The full-length gel blots that included in Figure 4b.

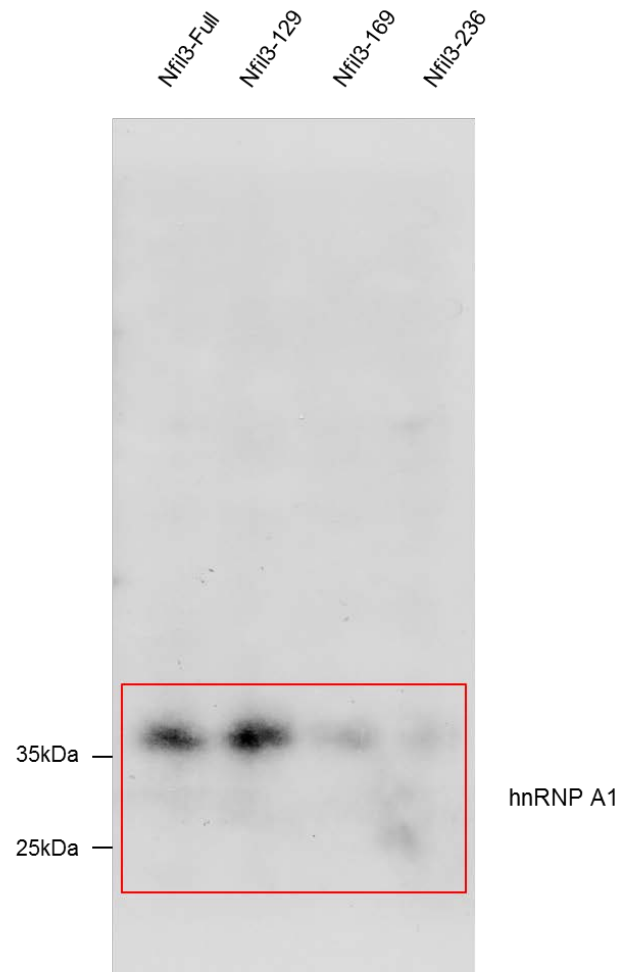

**Figure S7.** The full-length gel blot that included in Figure 4c.



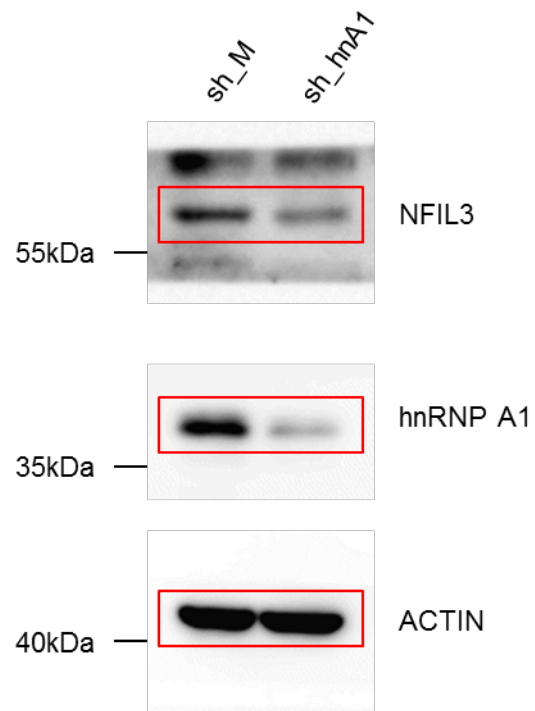

**Figure S8.** The full-length gel blots that included in Figure 5a.

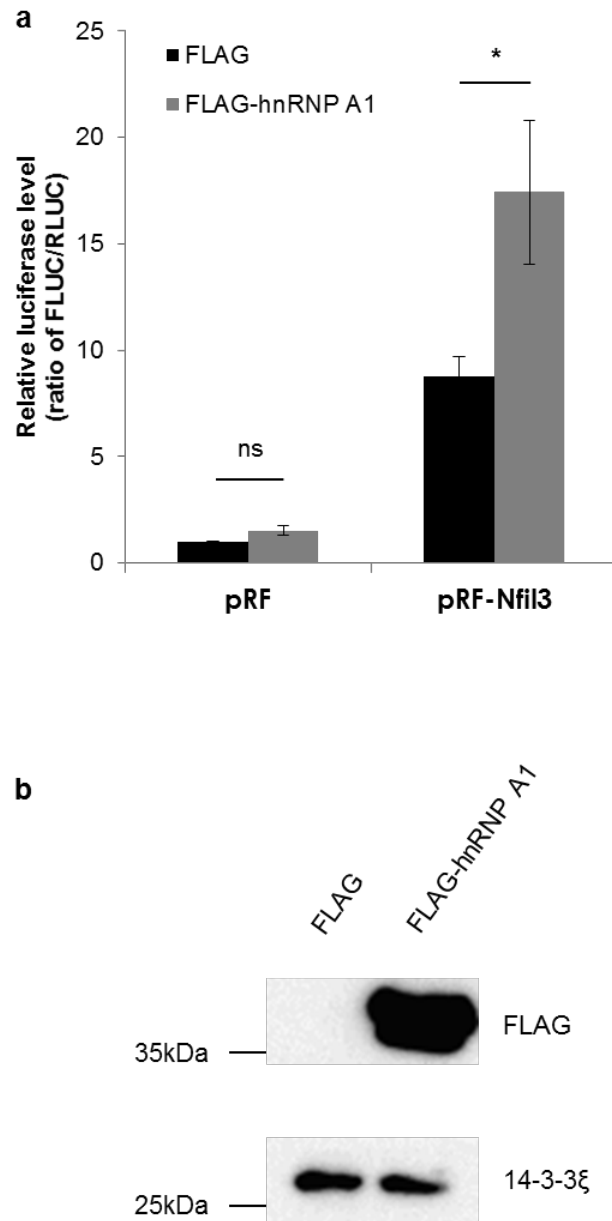

**Figure S9. Overexpression of hnRNP A1 upregulates Nfil3 IRES activity.** (a) 293A cells were transfected with FLAG and FLAG-hnRNP A1 before transfection with a bicistronic reporter vector. 293A cells were used to ensure efficient overexpression. Samples were harvested 24 hours after transfection of the reporter vector then subjected to immunoblotting and a luciferase assay. The ratio of FLUC/RLUC of cells transfected with FLAG and pRF empty vector was set to 1.0. Error bars represent mean  $\pm$  SEM ( $n = 4$ ), \*  $P < 0.05$ . (b) Confirmation of hnRNP A1 overexpression by immunoblotting.

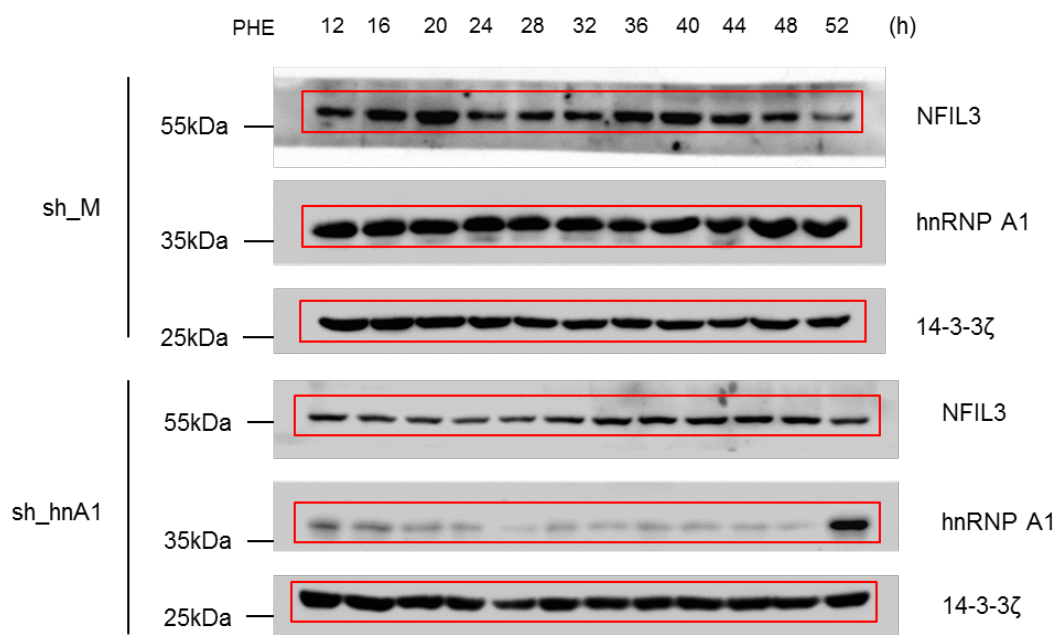

**Figure S10. The full-length gel blots that included in Figure 6a.**

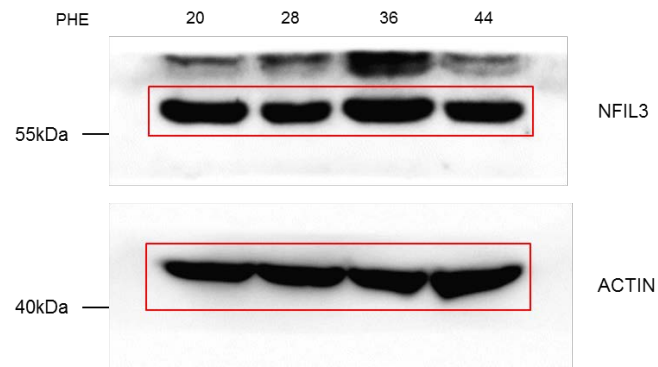

**Figure S11. The full-length gels blots that included in Figure 7a.**

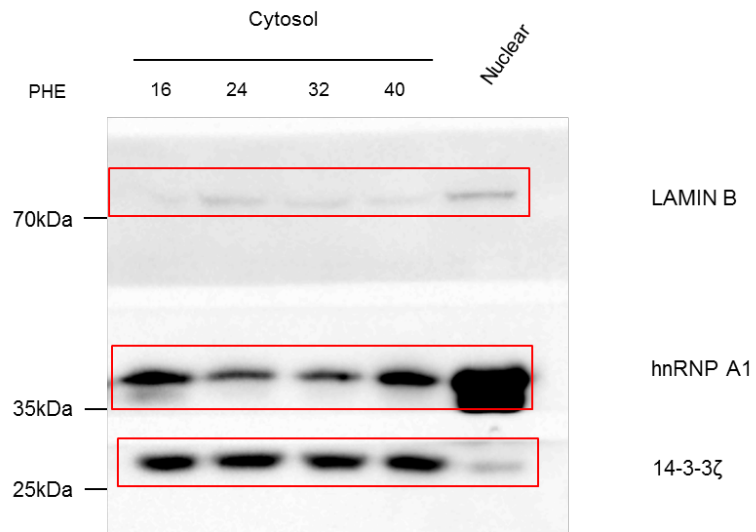

**Figure S12.** The full-length gels blots that included in Figure 7b.

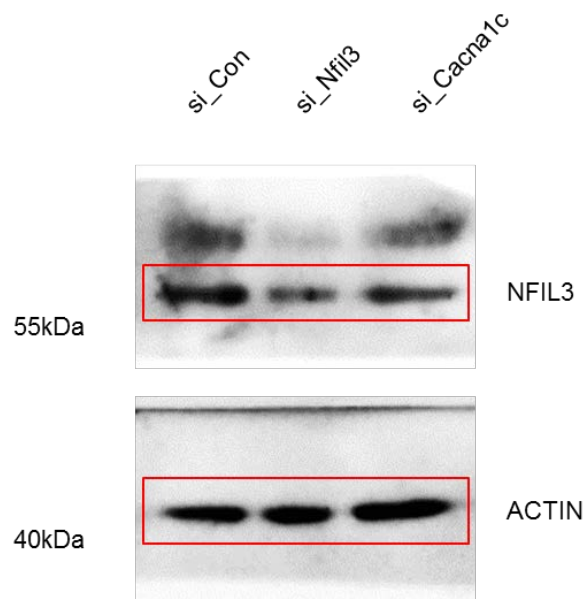

**Figure S13.** The full-length gels blots that included in Figure 8a.

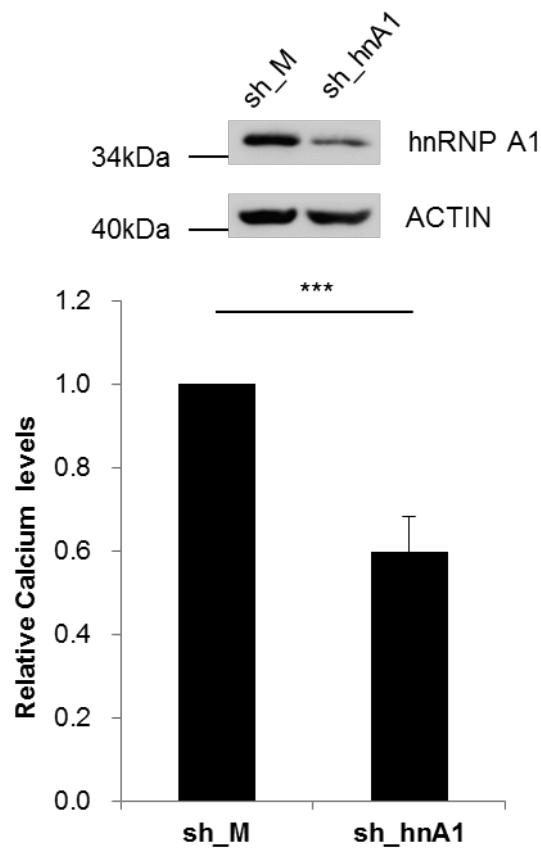

**Figure S14. Knockdown of hnRNP A1 affects to intracellular calcium level.** sh\_M and sh\_hnA1 expression vectors were transfected into MC3T3-E1 cells. Cells were harvested 48 hours after transfection and subjected to immunoblotting and intracellular calcium measurement. The intracellular calcium level in sh\_M transfected cells was set to 1.0. Error bars represent mean  $\pm$  SEM ( $n = 4$ ), \*\*\*  $P < 0.001$ .

## Supplementary Tables

|                          | Sequence (5' to 3')         |
|--------------------------|-----------------------------|
| pRF-Nfil3 (Forward)      | AAGTCGACACACATCTCTCGGCGC    |
| pRF-Nfil3 (Reverse)      | AACCCGGGCAGAAAGGACCTCC      |
| pRF-Nfil3-Rev (Forward)  | AACCCGGGACACATCTCTCGGCGC    |
| pRF-Nfil3-Rev (Reverse)  | AAGTCGACCAGAAAGGACCTCC      |
| pRF-129 (Forward)        | AAGTCGACGTTACAGCCGCCCTTTC   |
| pRF-129 (Reverse)        | Same to pRF-Nfil3 (Reverse) |
| pRF-169 (Forward)        | AAGTCGACGCAGAACCACGATAA     |
| pRF-169 (Reverse)        | Same to pRF-Nfil3 (Reverse) |
| pRF-236 (Forward)        | AAGTCGACATTGATGGATGAGAG     |
| pRF-236 (Reverse)        | Same to pRF-Nfil3 (Reverse) |
| pSK-Nfil3 (Forward)      | AAGAATTCACACATCTCTCGGCGC    |
| pSK-Nfil3 (Reverse)      | AATCTAGACAGAAAGGACCTCC      |
| pSK-129 (Forward)        | AAGAATTCGTTACAGCCGCCCTTTC   |
| pSK-129 (Reverse)        | Same to pSK-Nfil3 (Reverse) |
| pSK-169 (Forward)        | AAGAATTCGCAGAACCACGATAA     |
| pSK-169 (Reverse)        | Same to pSK-Nfil3 (Reverse) |
| pSK-236 (Forward)        | AAGAATTCATTGATGGATGAGAG     |
| pSK-236 (Reverse)        | Same to pSK-Nfil3 (Reverse) |
| pFLAG-hnRNP A1 (Forward) | AAGTCGACATGTCTAAGTCCGAGT    |
| pFLAG-hnRNP A1 (Reverse) | AAGGATCCTTAGAACCTCCTGCCA    |

**Table S1.** Sequences of PCR primers.



|                                            | Sequence (5' to 3')    |
|--------------------------------------------|------------------------|
| <b>mNfil3 (Forward)</b>                    | ATGAGGGTGTAGTGGGCAAG   |
| <b>mNfil3 (Reverse)</b>                    | GTTCACTTCCGGAACCTTCA   |
| <b>mPeriod2 (Forward)</b>                  | AGGATGTGGCAGGTAACAGG   |
| <b>mPeriod2 (Reverse)</b>                  | ATGCTCCAAACCACGTAAGG   |
| <b>mCryptochrome1 (Forward)</b>            | GCCAGGCGGAGAACTGAA     |
| <b>mCryptochrome1 (Reverse)</b>            | AAAATTTGCCACCCAAGCTTT  |
| <b>mBmal1 (Forward)</b>                    | GCAGTGCCACTGACTACCAAGA |
| <b>mBmal1 (Reverse)</b>                    | TCCTGGACATTGCATTGCAT   |
| <b>mCacna1c (Forward)</b>                  | TTGCCCTTCTTGTGCTCTTC   |
| <b>mCacna1c (Reverse)</b>                  | TATGCCCTCCTGGTTGTAGC   |
| <b>mGapdh (Forward)</b>                    | GCCATCAACGACCCCTTCATT  |
| <b>mGapdh (Reverse)</b>                    | GCTCCTGGAAGATGGTGATGG  |
| <b>m<math>\beta</math>-actin (Forward)</b> | GGCACCACACCTTCTACAATG  |
| <b>m<math>\beta</math>-actin (Reverse)</b> | GGGGTGTGAAGGTCTCAAAC   |

**Table S2.** Sequences of quantitative real-time PCR primers.
